# Supplementary material for: Coupling of PET waste electroreforming with green hydrogen generation using bifunctional catalyst
Source: Royal Society of Chemistry journal article supplement (doi:10.1039/d2se01007k), 2022-01-01
Supplement: d2se01007k1.pdf [file d2se01007k1.pdf]

## Supplementary Information

### Coupling of PET Waste Electroreforming with Green Hydrogen Generation using Bifunctional Catalyst

*Ying Li,<sup>‡a, b</sup> Li Quan Lee,<sup>‡b</sup> Zhi Gen Yu,<sup>c</sup> Hu Zhao,<sup>b</sup> Yong-Wei Zhang,<sup>c</sup> Pingqi Gao,<sup>\*a</sup>  
and Hong Li<sup>\*b</sup>*

a School of Materials, Guangdong Provincial Key Laboratory of Photovoltaic Technology, State Key Laboratory of Optoelectronic Materials and Technologies, Sun Yat-sen University, Guangzhou, 510275, China.

b School of Mechanical and Aerospace Engineering, Nanyang Technological University, 639798, Singapore.

c Institute of High Performance Computing, 138632, Singapore.

Corresponding author

\*E-mail: gaopq3@mail.sysu.edu.cn, ehongli@ntu.edu.sg

‡ Equal contribution

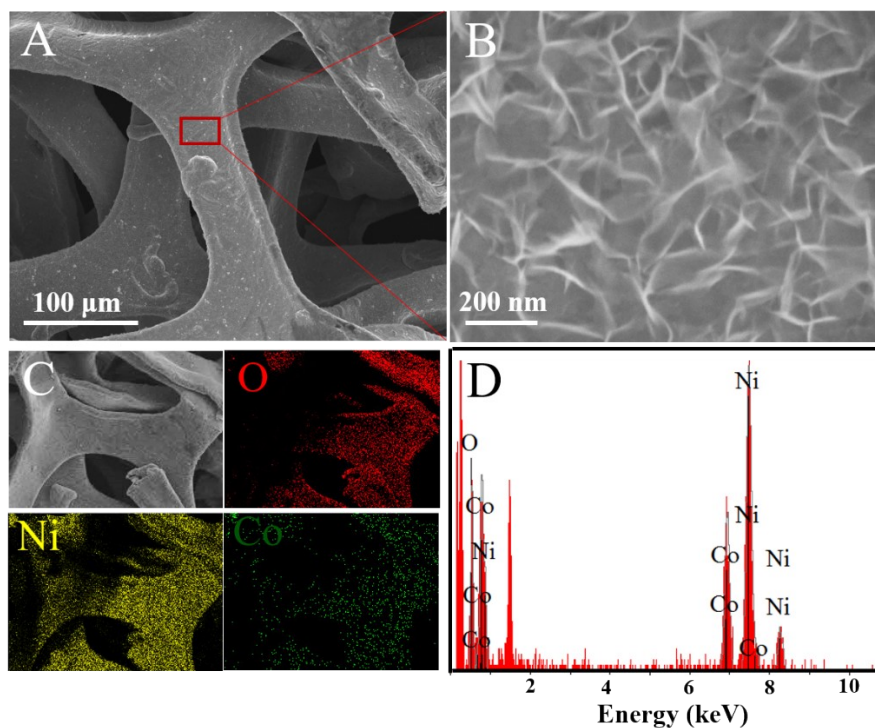

**Figure S1.** Morphological and composition characterizations of Co-Ni(OH)<sub>2</sub>/NF. (A) and (B) SEM images, (C) SEM-mapping, and (D) SEM-EDX.

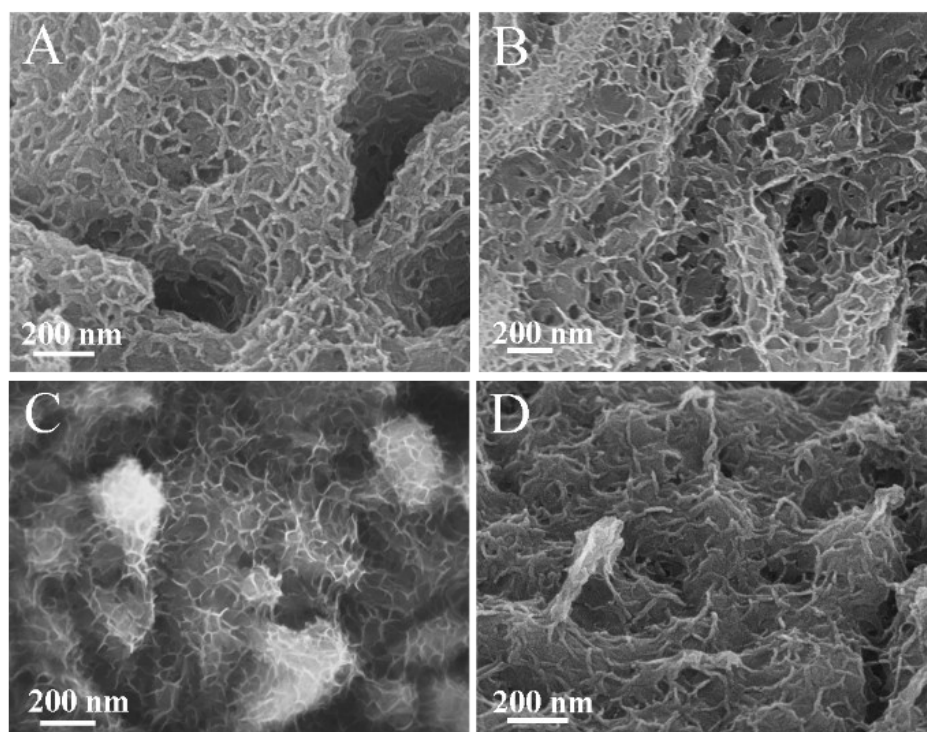

**Figure S2.** Morphological of four Co-Ni<sub>2</sub>P/NF sample. SEM images of (A) Co<sub>0.2</sub>-Ni<sub>2</sub>P/NF, (B) Co<sub>0.4</sub>-Ni<sub>2</sub>P/NF, (C) Co<sub>0.6</sub>-Ni<sub>2</sub>P/NF and (D) Co<sub>0.8</sub>-Ni<sub>2</sub>P/NF.

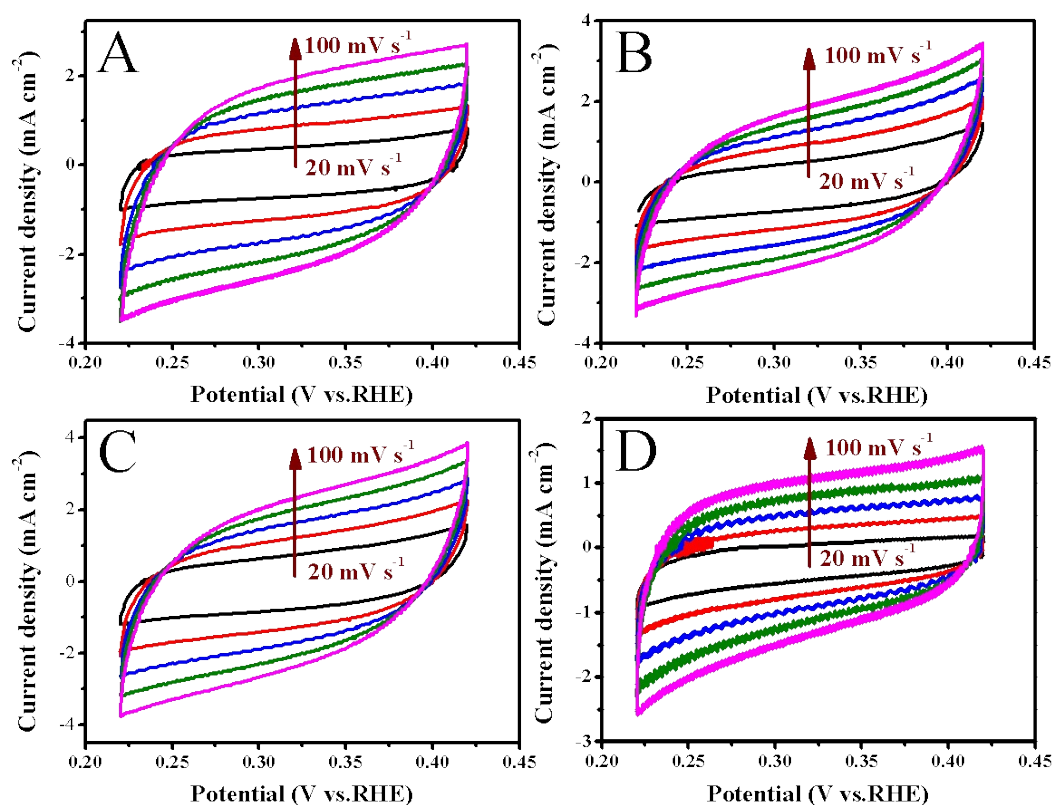

**Figure S3.** CV curves of (A) Co<sub>0.6</sub>-Ni<sub>2</sub>P/NF, (B) Ni<sub>2</sub>P/NF, (C) CoP/NF, and (D) Co-Ni(OH)<sub>2</sub>/NF in 1 M NaOH electrolyte at different scan rates.

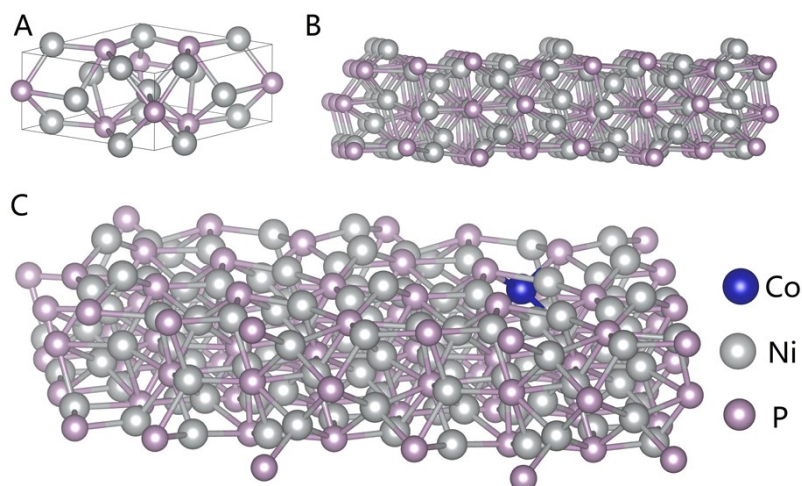

**Figure S4.** The atomic models of Ni<sub>2</sub>P unitcell. (A) pristine surface (B) and Co doped surface.

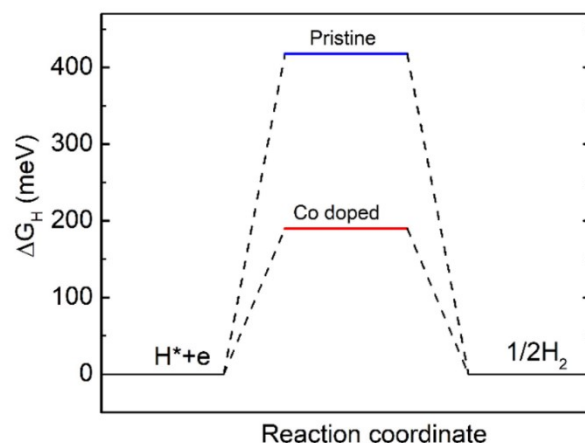

**Figure S5.** The calculated Gibbs free energies of H on the pristine and Co doped Ni<sub>2</sub>P surfaces.

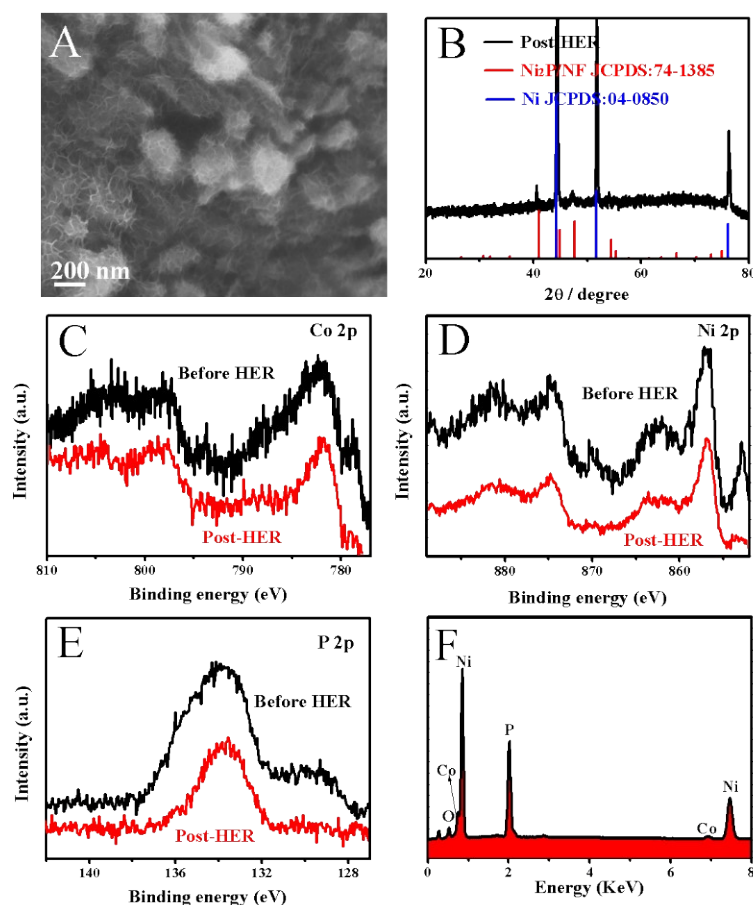

**Figure S6.** The morphology characterization and composition analyses of Co<sub>0.6</sub>-Ni<sub>2</sub>P/NF after HER reaction. (A) the SEM image, (B) XRD pattern, high-resolution XPS spectra of (C) Co 2p, (D) Ni 2p, (E) P 2p peaks of the Co-Ni<sub>2</sub>P/NF and (F) SEM-EDS spectral of the Co-Ni<sub>2</sub>P/NF.

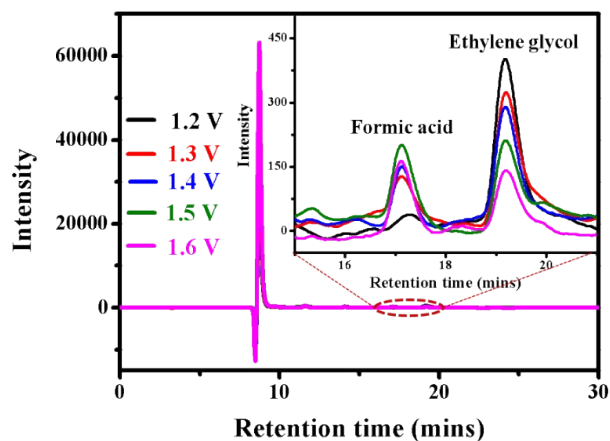

**Figure S7.** The HPLC analysis of the products of PET hydrolysate electrooxidation.

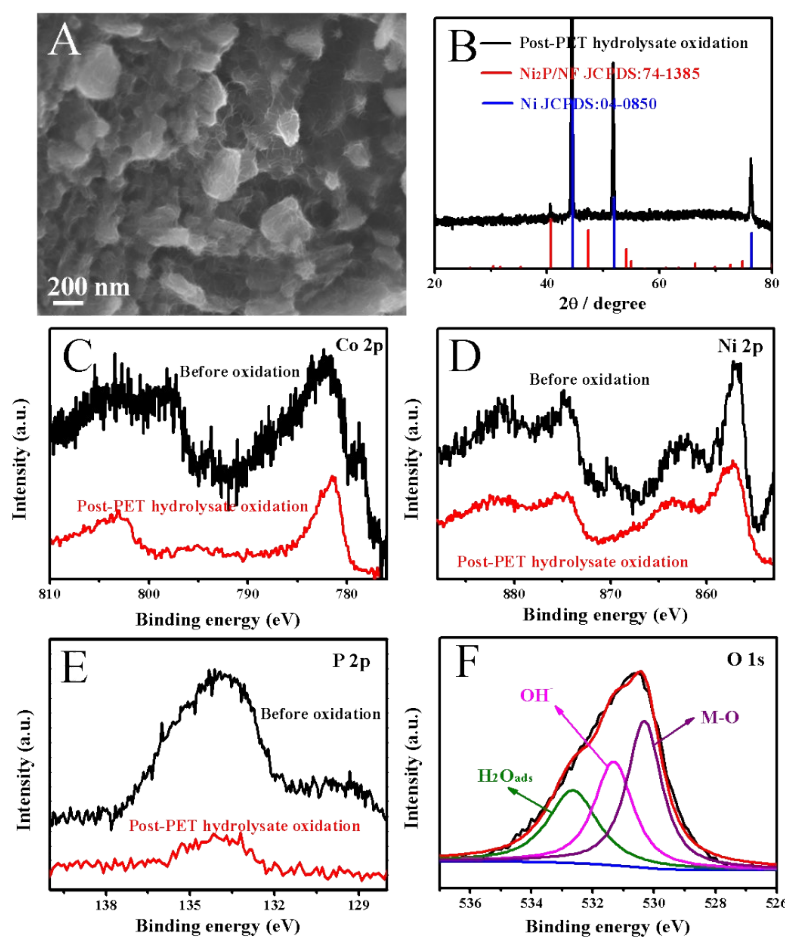

**Figure S8.** The morphology characterization and composition analyses of Co-Ni<sub>2</sub>P/NF post-PET hydrolysate electrooxidation. (A) the SEM image, (B) XRD pattern, high-resolution XPS spectra of (C) Co 2p, (D) Ni 2p, (E) P 2p and (F) O 1s peaks of the Co-Ni<sub>2</sub>P/NF.

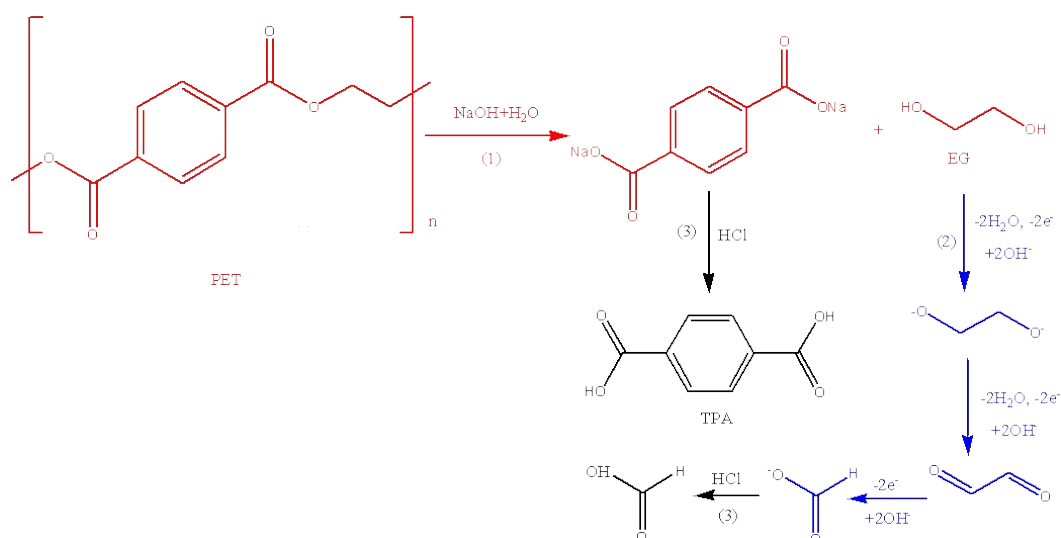

**Figure S9.** The process for waste PET bottle upcycling.

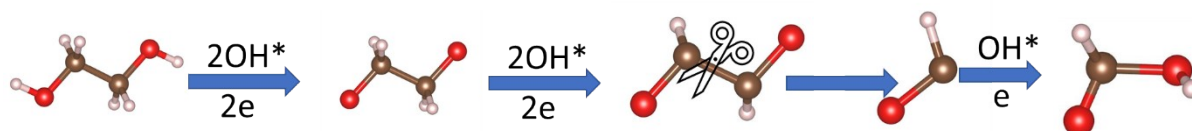

**Figure S10.** The sketch of the electrooxidation process of the ethylene glycol (EG).

The final product is formic acid ( $\text{HCOOH}$ ).

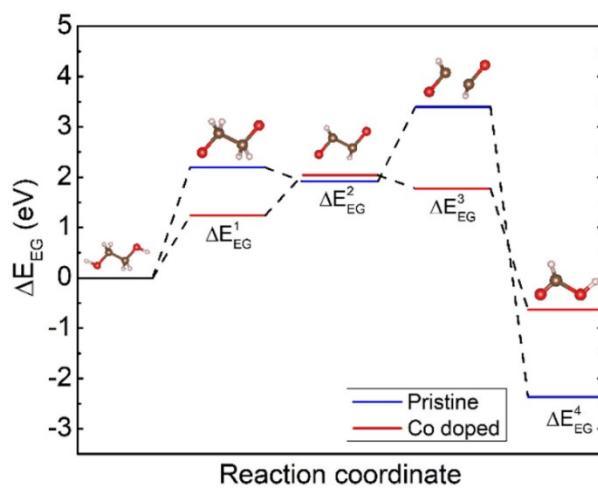

**Figure S11.** The calculated energy landscape of the EG electrooxidation reaction process on the pristine and Co doped  $\text{Ni}_2\text{P}$  surfaces.
